# Supplementary material for: Approaching the free-ion limit in magnetically isotropic gadolinium(iii) via borohydride ligands
Source: Royal Society of Chemistry journal article supplement (doi:10.1039/d3cp01047c), 2023-01-01
Supplement: d3cp01047c1.pdf [file d3cp01047c1.pdf]

## Approaching the free-ion limit in magnetically isotropic gadolinium(III) *via* borohydride ligands

Michał Magott\*<sup>a</sup> and Wojciech Wegner\*<sup>b</sup>

*a) Faculty of Chemistry, Jagiellonian University, Gronostajowa 2, 30-387 Krakow, Poland.*

*b) Centre of New Technologies, University of Warsaw, ul. Banacha 2c, 02-097 Warszawa, Poland.*

*E-mail: [w.wegner@cent.uw.edu.pl](mailto:w.wegner@cent.uw.edu.pl); [michal.magott@uj.edu.pl](mailto:michal.magott@uj.edu.pl)*

|                                          |   |
|------------------------------------------|---|
| S1. Results of Rietveld refinement ..... | 1 |
| S2. Magnetic measurements.....           | 6 |

### ***S1. Results of Rietveld refinement***

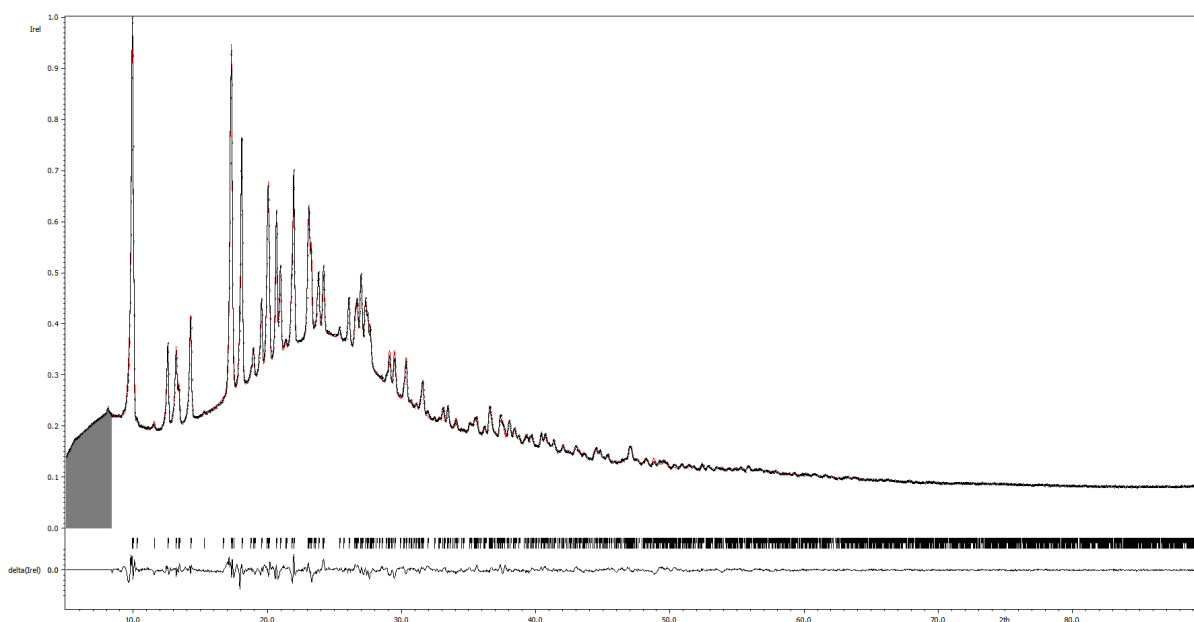

**Figure S1.** Rietveld refinement for sample containing only **1**. Experimental data are represented by a black curve, calculated profile by a red curve. The positions of the Bragg reflections are marked and the difference curve (between the experimental and calculated profiles) are plotted at the bottom figure. Excluded region: minor impurities from zeolitic molecular sieves used for drying the DCM.

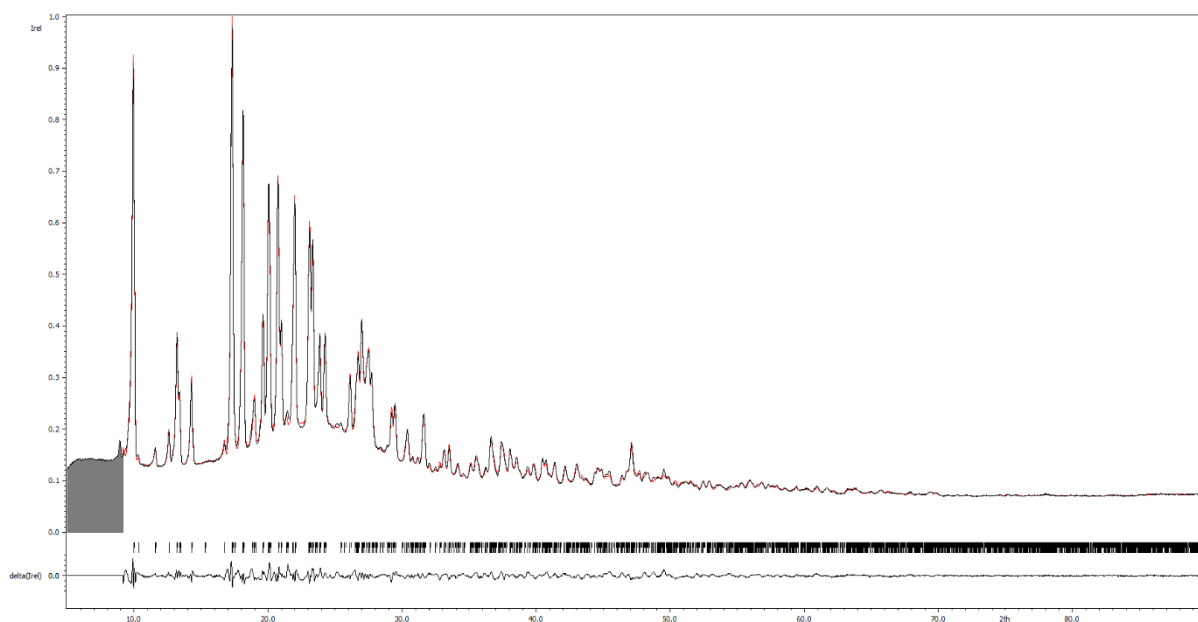

**Figure S2.** Rietveld refinement for sample containing only **2**. Experimental data are represented by a black curve, calculated profile by a red curve. The positions of the Bragg reflections are marked and the difference curve (between the experimental and calculated profiles) are plotted at the bottom figure. Excluded region: minor impurities from zeolitic molecular sieves used for drying the DCM.

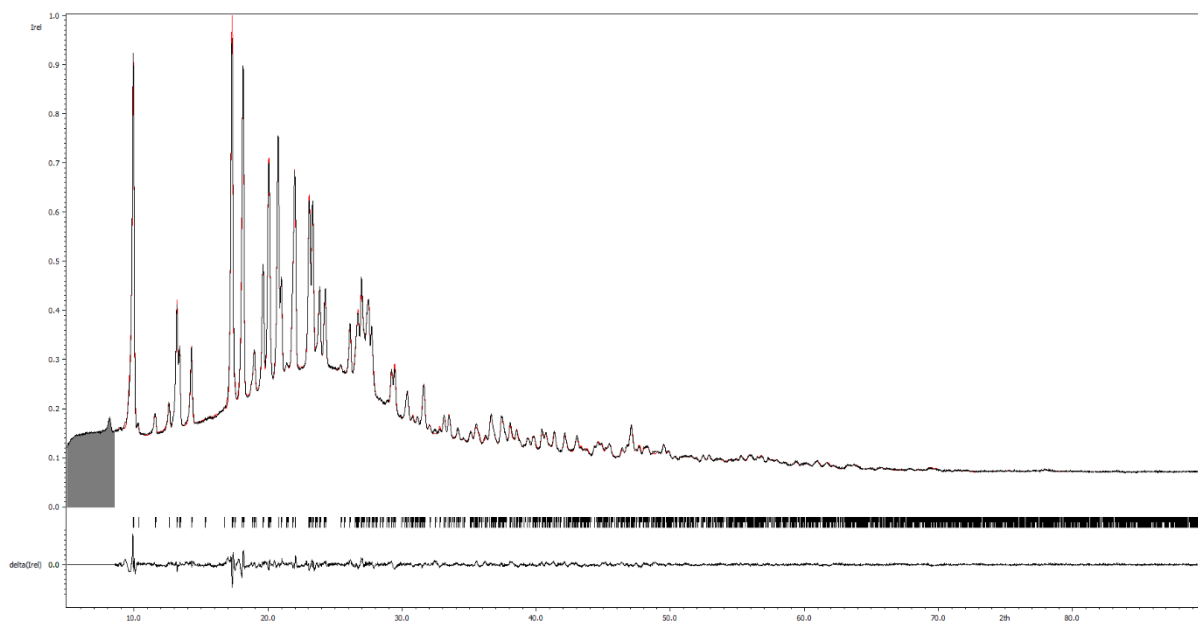

**Figure S3.** Rietveld refinement for sample containing only **3**. Experimental data are represented by a black curve, calculated profile by a red curve. The positions of the Bragg reflections are marked and the difference curve (between the experimental and calculated profiles) are plotted at the bottom figure. Excluded region: minor impurities from zeolitic molecular sieves used for drying the DCM.

**Table S1.** Comparison of the crystal structure parameters of known  $\alpha$ -TBARE(BH<sub>4</sub>)<sub>4</sub> with gadolinium compounds obtained here.\*

| Ln                                  | Gd (1)             |             |             | Gd <sub>0.097</sub> Y <sub>0.903</sub> (2) | Gd <sub>0.017</sub> Y <sub>0.983</sub> (3) | Dy <sup>1</sup>    | Dy <sub>0.1</sub> Y <sub>0.9</sub> <sup>1</sup> | Y <sup>2</sup>     |             | Ho <sup>3</sup>    |             | Tm <sup>3</sup>    |
|-------------------------------------|--------------------|-------------|-------------|--------------------------------------------|--------------------------------------------|--------------------|-------------------------------------------------|--------------------|-------------|--------------------|-------------|--------------------|
| RE <sup>3+</sup> r <sup>1</sup> [Å] | 0.938              |             |             | 0.938/0.900                                | 0.938/0.900                                | 0.912              | 0.912/0.900                                     | 0.900              |             | 0.901              |             | 0.880              |
| space group                         | P2 <sub>1</sub> /c |             |             | P2 <sub>1</sub> /c                         | P2 <sub>1</sub> /c                         | P2 <sub>1</sub> /c | P2 <sub>1</sub> /c                              | P2 <sub>1</sub> /c |             | P2 <sub>1</sub> /c |             | P2 <sub>1</sub> /c |
| T [K]                               | DFT (0 K)          | 100         | RT          | RT                                         | RT                                         | RT                 | RT                                              | 100                | RT          | 100                | RT          | RT                 |
| a [Å]                               | 11.28150           | 11.0900(5)  | 11.4886(10) | 11.4444(9)                                 | 11.4412(5)                                 | 11.4240(10)        | 11.4464(7)                                      | 11.0453(5)         | 11.4181(10) | 11.039(3)          | 11.4218(9)  | 11.4063(18)        |
| b [Å]                               | 19.83197           | 19.9970(10) | 20.590(3)   | 20.568(2)                                  | 20.5624(14)                                | 20.531(2)          | 20.5665(17)                                     | 20.0099(9)         | 20.510(3)   | 19.999(2)          | 20.553(2)   | 20.545(4)          |
| c [Å]                               | 15.26347           | 14.7492(7)  | 15.3211(18) | 15.3112(14)                                | 15.3137(9)                                 | 15.2885(18)        | 15.3250(12)                                     | 14.7204(8)         | 15.2811(19) | 14.708(4)          | 15.3049(17) | 15.319(3)          |
| β [°]                               | 130.80281          | 128.282(1)  | 129.528(7)  | 129.446(6)                                 | 129.445(4)                                 | 129.478(8)         | 129.468(4)                                      | 127.980(5)         | 129.464(8)  | 128.02(4)          | 129.433(7)  | 129.423(12)        |
| V [Å <sup>3</sup> ]                 | 2585.0             | 2567.5(2)   | 2795.4(6)   | 2783.2(5)                                  | 2782.1(3)                                  | 2767.8(6)          | 2785.1(4)                                       | 2564.44            | 2762.77     | 2558.1(10)         | 2775.0(5)   | 2773.1(10)         |
| Z                                   | 4                  |             |             | 4                                          | 4                                          | 4                  | 4                                               | 4                  |             | 4                  |             | 4                  |

\* Effective ionic radius (6-coordinate, octahedral environment) from ref. <sup>4</sup>

**Table S2.** Gd–Gd, Gd–B and Gd–H distances and B–Gd–B angles from **1** crystal structure obtained by SC-XRD at 100 K.

| <b>Distance</b>                | <b>1 (100 K)</b> |
|--------------------------------|------------------|
| shortest Gd <sup>III</sup> -Gd | 7.7784(6) Å      |
|                                | 8.7949(6) Å      |
|                                | 9.0640(5) Å      |
| Gd1-B1                         | 2.529(5) Å       |
| Gd1-B2                         | 2.533(5) Å       |
| Gd1-B3                         | 2.532(5) Å       |
| Gd1-B4                         | 2.522(5) Å       |
| Gd1-H1B                        | 2.30(5) Å        |
| Gd1-H2B                        | 2.33(4) Å        |
| Gd1-H4B                        | 2.33(4) Å        |
| Gd1-H5B                        | 2.28(5) Å        |
| Gd1-H6B                        | 2.36(5) Å        |
| Gd1-H7B                        | 2.32(5) Å        |
| Gd1-H9B                        | 2.26(5) Å        |
| Gd1-H10B                       | 2.26(5) Å        |
| Gd1-H11B                       | 2.32(5) Å        |
| Gd1-H13B                       | 2.32(5) Å        |
| Gd1-H14B                       | 2.30(5) Å        |
| Gd1-H15B                       | 2.32(5) Å        |
| <b>Angle</b>                   |                  |
| B1-Gd1-B2                      | 107.43(17)°      |
| B1-Gd1-B3                      | 108.32(18)°      |
| B1-Gd1-B4                      | 109.43(16)°      |
| B2-Gd1-B3                      | 110.31(18)°      |
| B2-Gd1-B4                      | 111.87(16)°      |
| B3-Gd1-B4                      | 109.39(17)°      |

**Table S3.** RE–RE, RE–B and RE–H distances and B–RE–B angles from **1-3** crystal structures obtained by PXRD at RT.

| <b>Distance</b>  | <b>1 (RT)</b> | <b>2 (RT)</b> | <b>3 (RT)</b> |
|------------------|---------------|---------------|---------------|
| shortest RE...RE | 8.123(9) Å    | 8.128(7) Å    | 8.133(6) Å    |
|                  | 9.270(8) Å    | 9.258(7) Å    | 9.259(5) Å    |
|                  | 9.34(4) Å     | 9.30(3) Å     | 9.34(2) Å     |
|                  | 9.73(4) Å     | 9.68(3) Å     | 9.62(2) Å     |
| RE-B1            | 2.48(9) Å     | 2.66(8) Å     | 2.46(7) Å     |
| RE-B2            | 2.48(11) Å    | 2.26(12) Å    | 2.42(8) Å     |
| RE-B3            | 2.49(6) Å     | 2.44(10) Å    | 2.13(7) Å     |
| RE-B4            | 2.47(4) Å     | 2.48(5) Å     | 2.42(4) Å     |
| RE-H2_b          | 2.36(19) Å    | 2.51(14) Å    | 2.34(7) Å     |
| RE-H3_b          | 2.3(6) Å      | 2.5(5) Å      | 2.3(4) Å      |
| RE-H4_b          | 2.3(3) Å      | 2.52(14) Å    | 2.33(14) Å    |
| RE-H6_b          | 2.36(18) Å    | 2.4(3) Å      | 2.31(13) Å    |
| RE-H7_b          | 2.35(12) Å    | 2.37(12) Å    | 2.30(11) Å    |
| RE-H8_b          | 2.35(14) Å    | 2.3(3) Å      | 2.32(18) Å    |
| RE-H10_b         | 2.37(12) Å    | 2.34(16) Å    | 2.06(13) Å    |
| RE-H11_b         | 2.3(4) Å      | 2.3(4) Å      | 2.0(4) Å      |
| RE-H12_b         | 2.37(15) Å    | 2.34(9) Å     | 2.05(8) Å     |
| RE-H14_b         | 2.36(5) Å     | 2.2(3) Å      | 2.3(4) Å      |
| RE-H15_b         | 2.36(16) Å    | 2.2(3) Å      | 2.30(7) Å     |
| RE-H16_b         | 2.36(8) Å     | 2.2(4) Å      | 2.3(4) Å      |
| <b>Angle</b>     |               |               |               |
| B1-RE-B2         | 117(4)°       | 112(4)°       | 104(3)°       |
| B1-RE-B3         | 98(3)°        | 106(3)°       | 112(3)°       |
| B1-RE-B4         | 112(3)°       | 116(3)°       | 111(3)°       |
| B2-RE-B3         | 114(3)°       | 116(4)°       | 107(3)°       |
| B2-RE-B4         | 105(3)°       | 109(3)°       | 114(3)°       |
| B3-RE-B4         | 112(3)°       | 97(3)°        | 107(3)°       |

## S2. Magnetic measurements

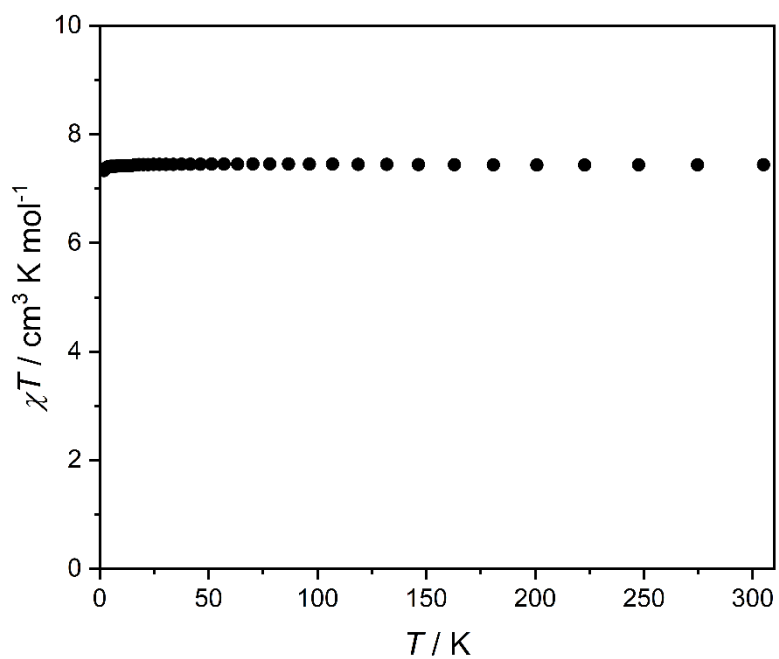

**Figure S4.**  $\chi T(T)$  curve recorded under  $H_{dc} = 1000$  Oe for **1**.

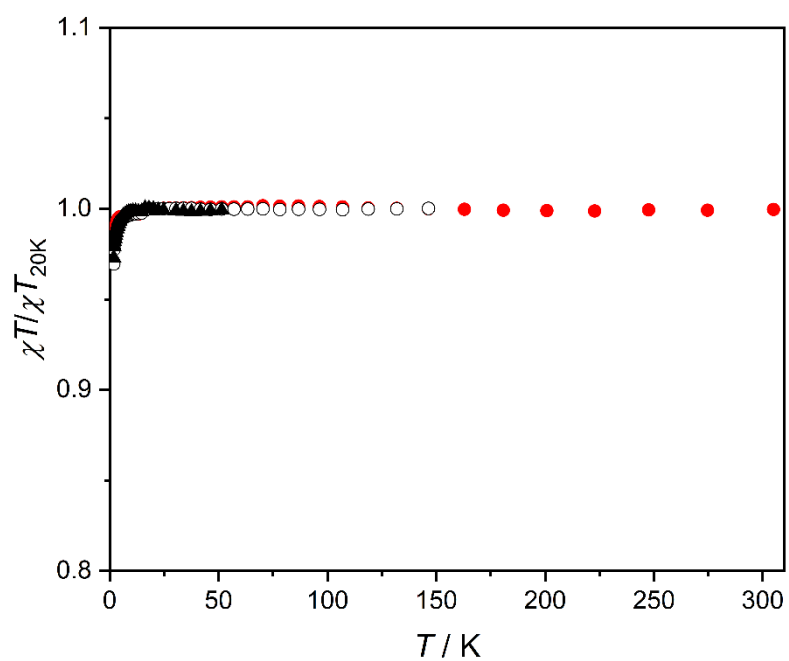

**Figure S5.**  $\chi T(T)$  curves recorded under  $H_{dc} = 1000$  Oe for **1** (red full circles), **2** (open circles) and **3** (black triangles). The  $\chi T$  values for all compounds were divided by the  $\chi T$  value at 20 K, to allow their direct comparison.

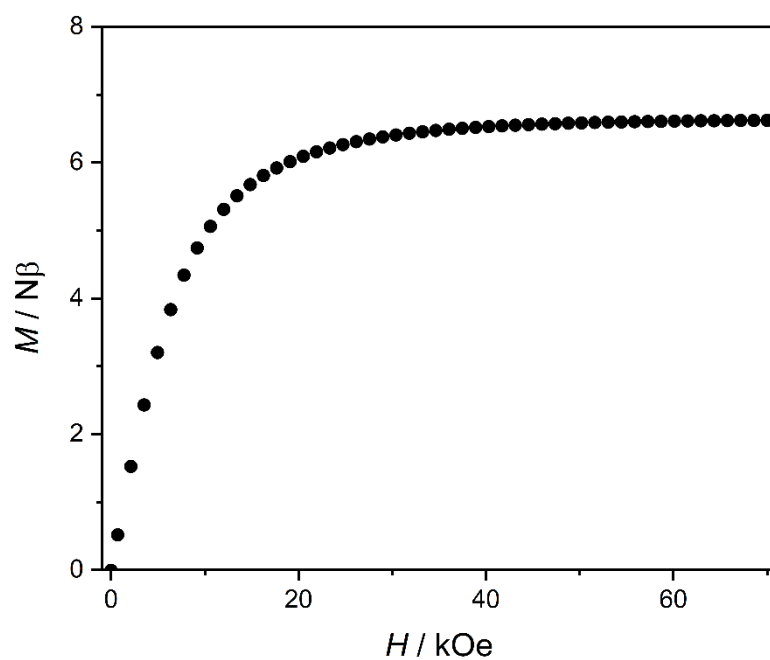

**Figure S6.**  $M(H)$  curve at  $T = 1.8$  K for **1**.

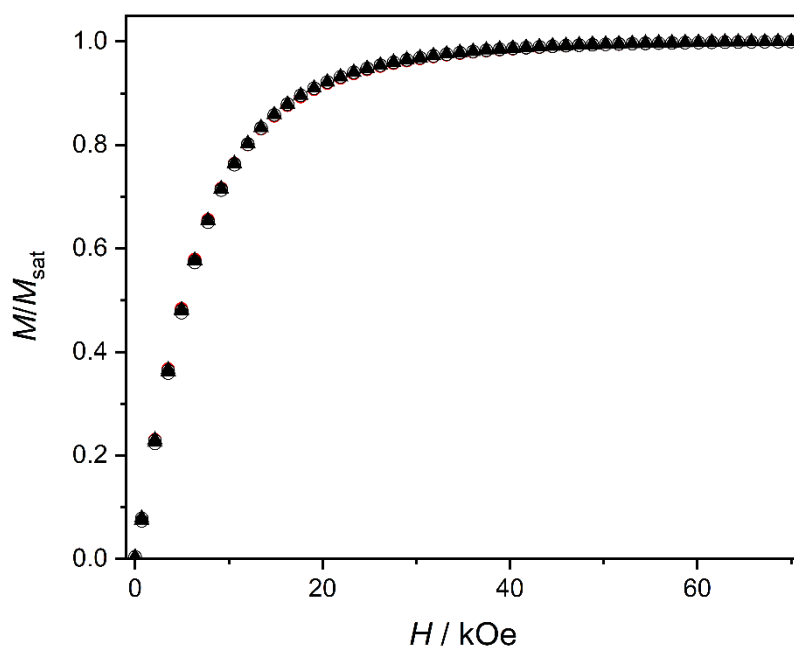

**Figure S7.**  $M(H)$  curves at  $T = 1.8$  K for **1** (black circles), **2** (open circles) and **3** (black triangles). The magnetisation values for all compounds were divided by the magnetisation value at saturation (at 70 kOe), to allow their direct comparison.

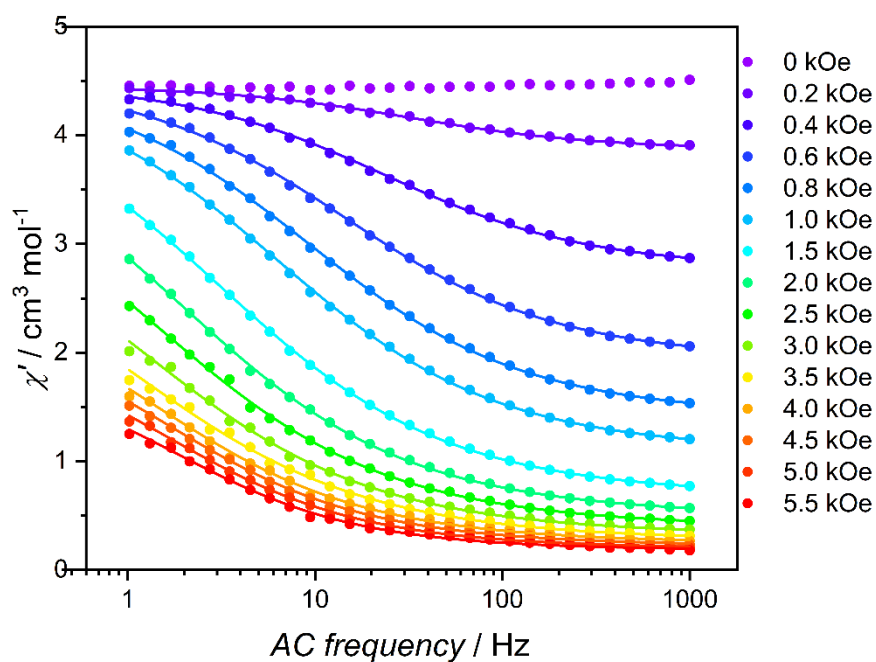

**Figure S8.** Frequency dependence of  $\chi'$  recorded at  $H_{dc} = 0-5500$  Oe range for **1** at  $T = 1.8$  K. Solid lines present the best fits to the generalised Debye model.

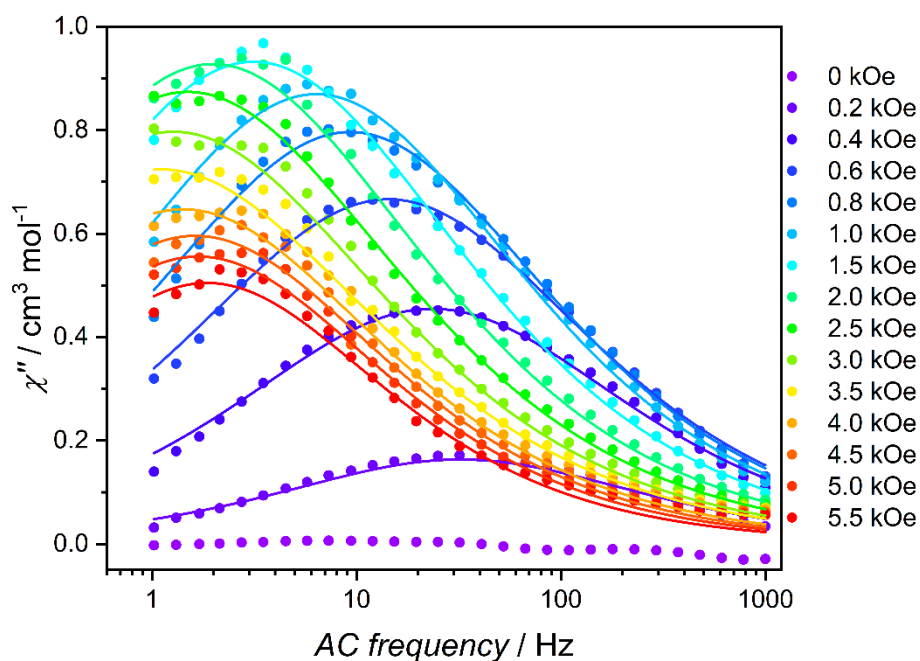

**Figure S9.** Frequency dependence of  $\chi''$  recorded at  $H_{dc} = 0-5500$  Oe range for **1** at  $T = 1.8$  K. Solid lines present the best fits to the generalised Debye model.



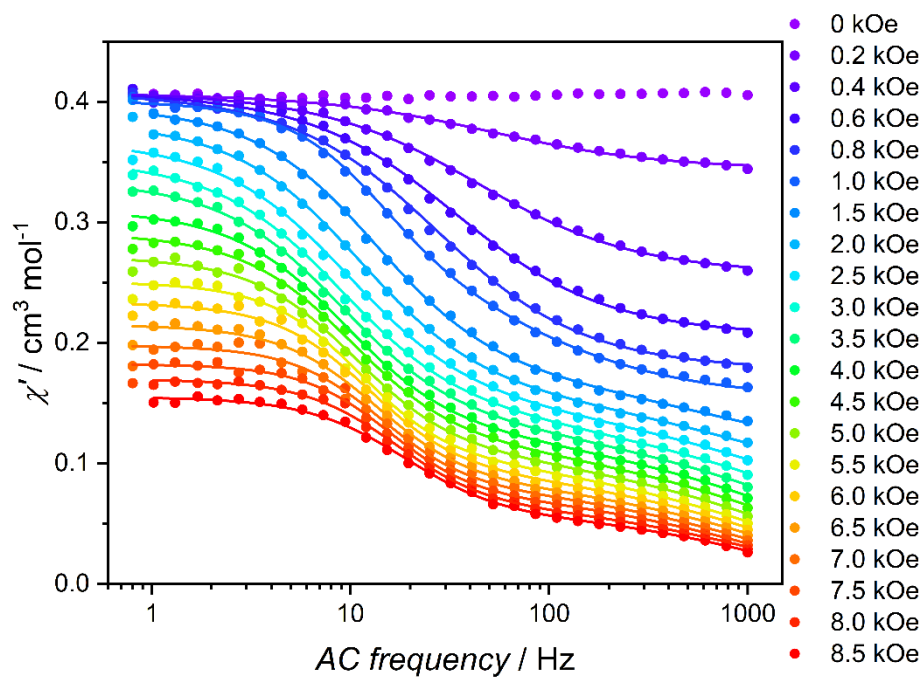

**Figure S10.** Frequency dependence of  $\chi'$  recorded at  $H_{dc} = 0\text{-}9000$  Oe range for **2** at  $T = 1.8$  K. Solid lines present the best fits to the generalised Debye model.

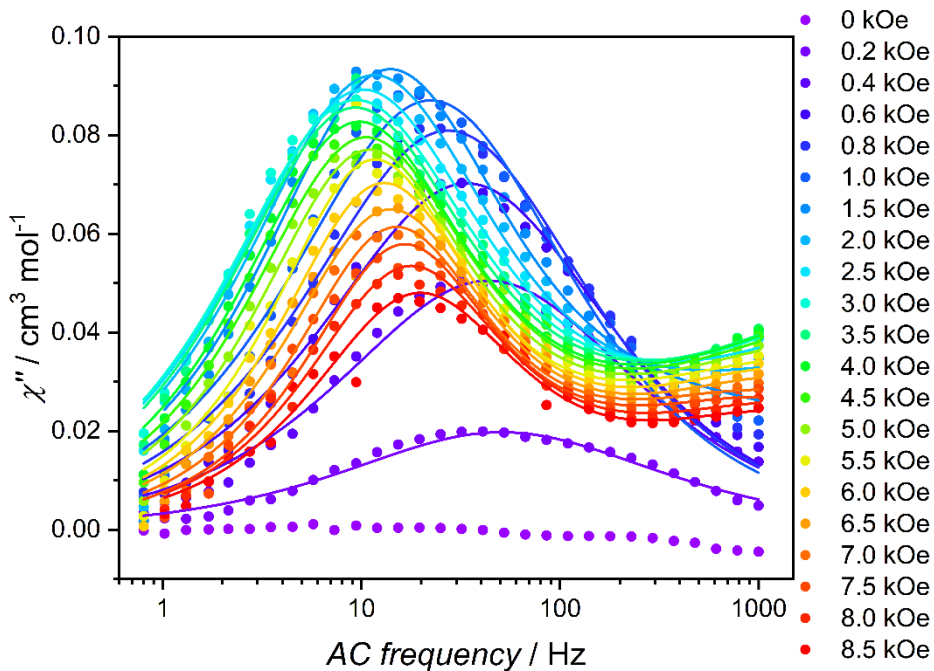

**Figure S11.** Frequency dependence of  $\chi''$  recorded at  $H_{dc} = 0\text{-}9000$  Oe range for **2** at  $T = 1.8$  K. Solid lines present the best fits to the generalised Debye model.

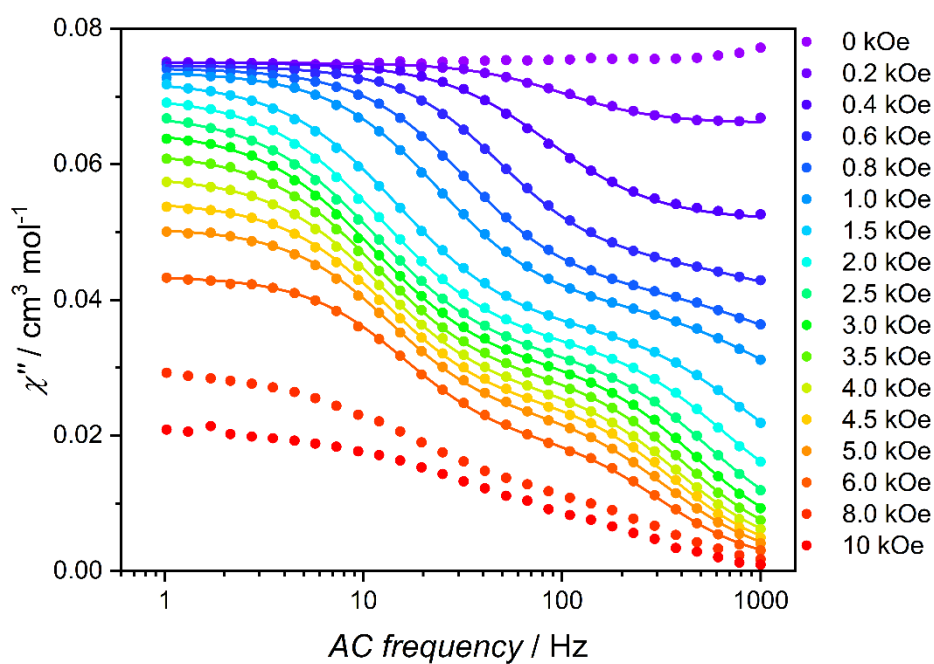

**Figure S12.** Frequency dependence of  $\chi'$  recorded at  $H_{dc} = 0-10000$  Oe range for **3** at  $T = 1.8$  K. Solid lines present the best fits to the generalised Debye model.

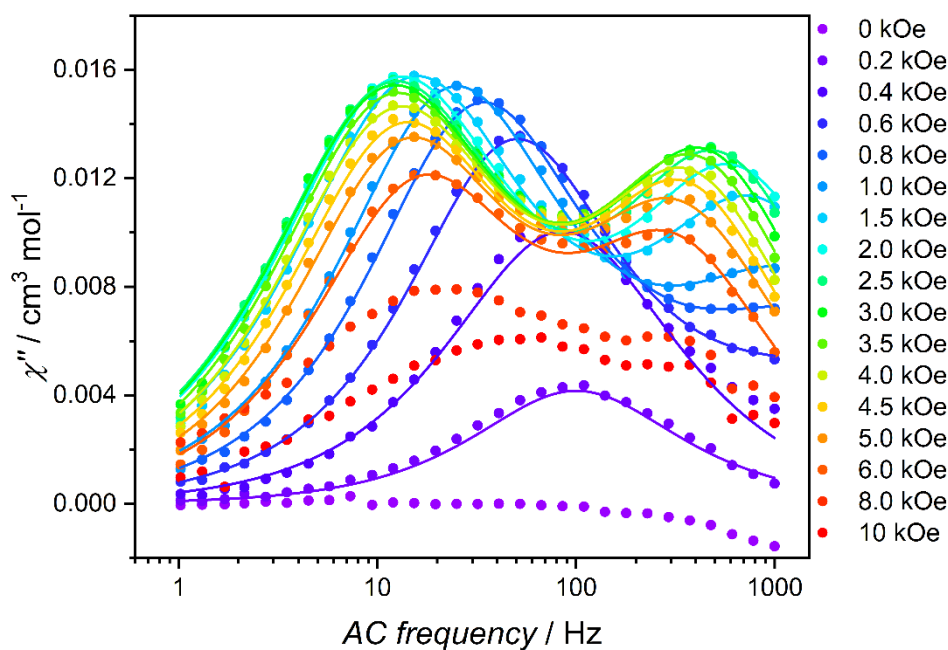

**Figure S13.** Frequency dependence of  $\chi''$  recorded at  $H_{dc} = 0-10000$  Oe range for **3** at  $T = 1.8$  K. Solid lines present the best fits to the generalised Debye model.

**Table S4.** Fit parameters obtained from *ac* magnetic measurements for **1-3** at 1.8 K.\*

| Compound               | <b>1</b>  | <b>2</b>   | <b>3</b>  |
|------------------------|-----------|------------|-----------|
| $A_1 / s^{-1} Oe^{-2}$ | 3.5(2)E-7 | 1.20(3)E-6 | 1.9(5)E-6 |
| $A_2 / s^{-1}$         | 250(7)    | 346(5)     | 791(54)   |
| $A_3 / Oe^{-2}$        | 0 (fixed) | 1.6(1)E-7  | 2.1(8)E-7 |
| $A_4 / Oe^{-2}$        | 5.1(3)E-6 | 1.98(9)E-6 | 5.0(8)E-6 |
| $R^2$                  | 0.99684   | 0.99822    | 0.98296   |

\*assuming  $\tau^{-1}(H) = A_1 H^2 + A_2(1 + A_3 H^2)/(1 + A_4 H^2)$

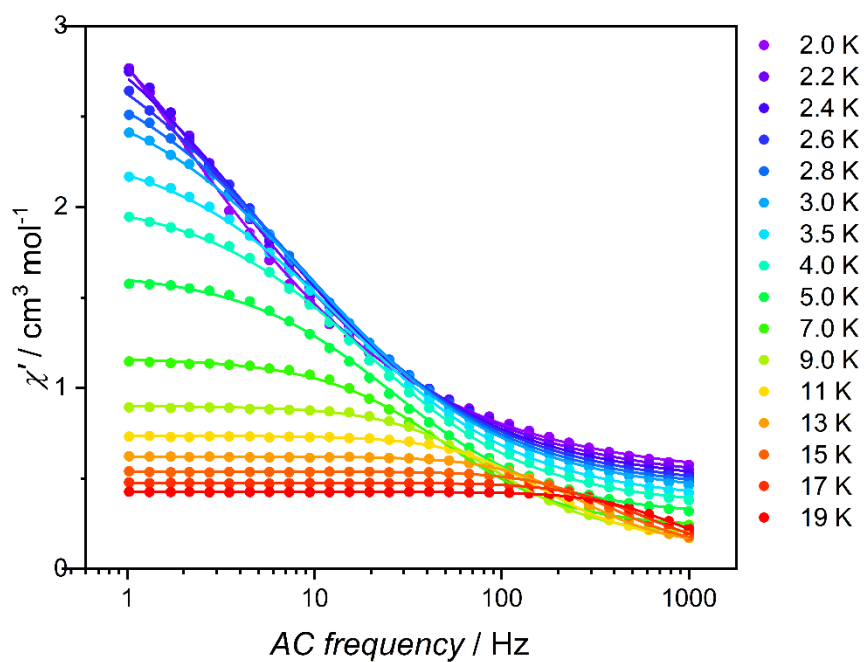

**Figure S14.** Frequency dependence of  $\chi'$  recorded at  $H_{dc} = 2000$  Oe for **1**. Solid lines present the best fits to the generalised Debye model.

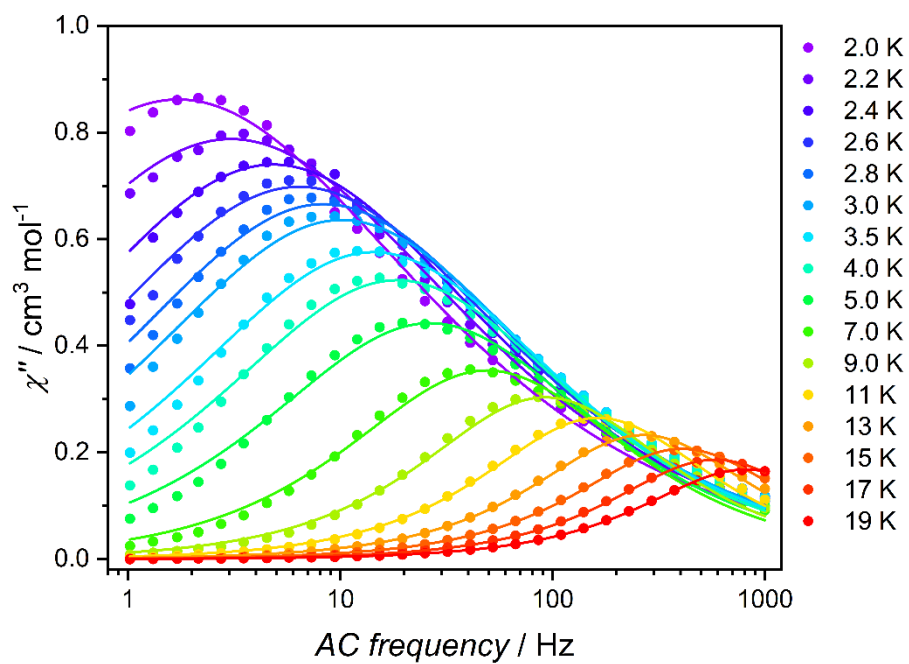

**Figure S15.** Frequency dependence of  $\chi''$  recorded at  $H_{dc} = 2000$  Oe for **1**. Solid lines present the best fits to the generalised Debye model.

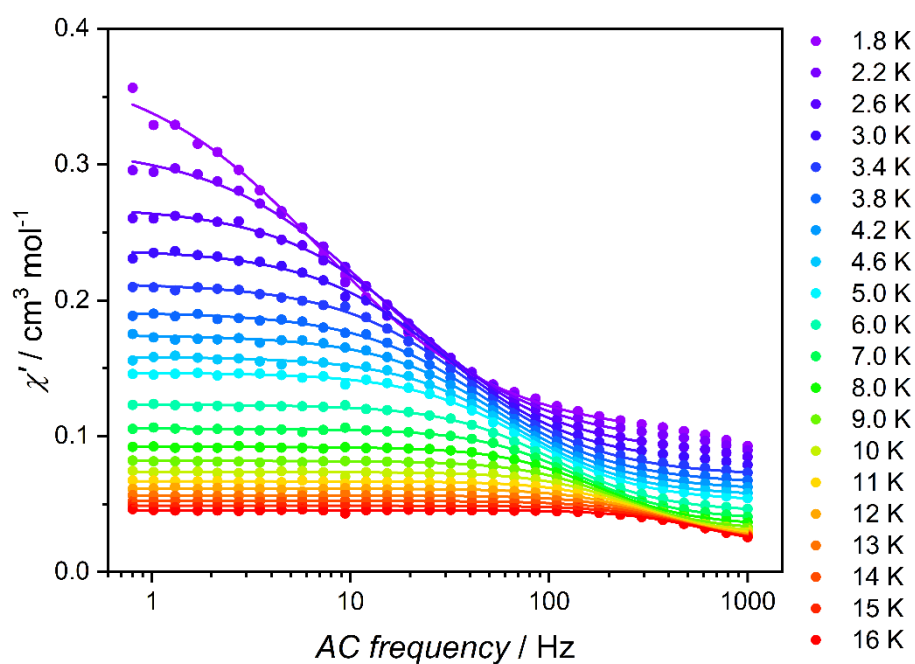

**Figure S16.** Frequency dependence of  $\chi'$  recorded at  $H_{dc} = 2500$  Oe for **2**. Solid lines present the best fits to the generalized Debye model.

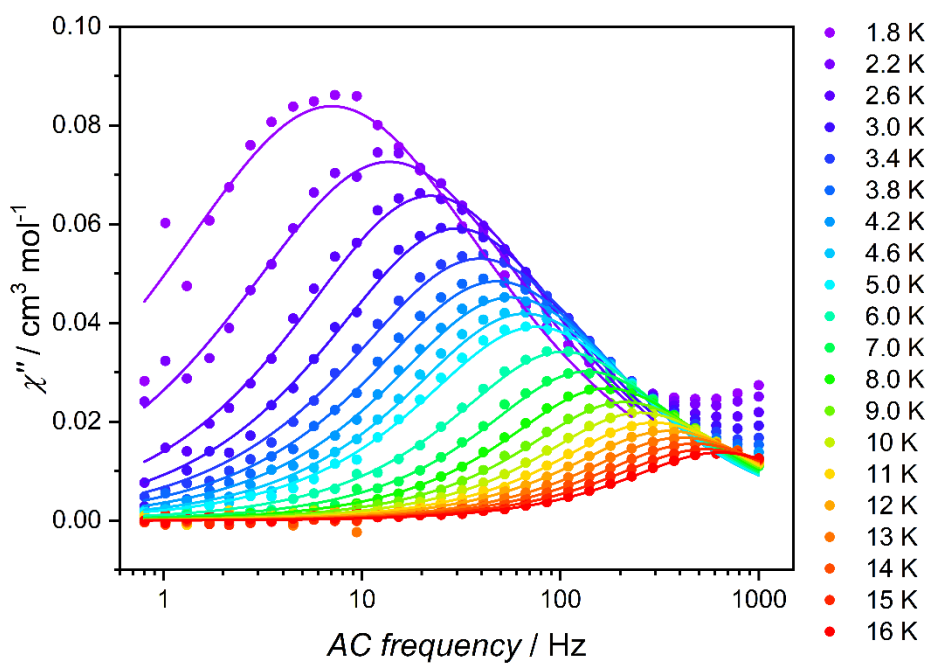

**Figure S17.** Frequency dependence of  $\chi''$  recorded at  $H_{dc} = 2500$  Oe for **2**. Solid lines present the best fits to the generalized Debye model.

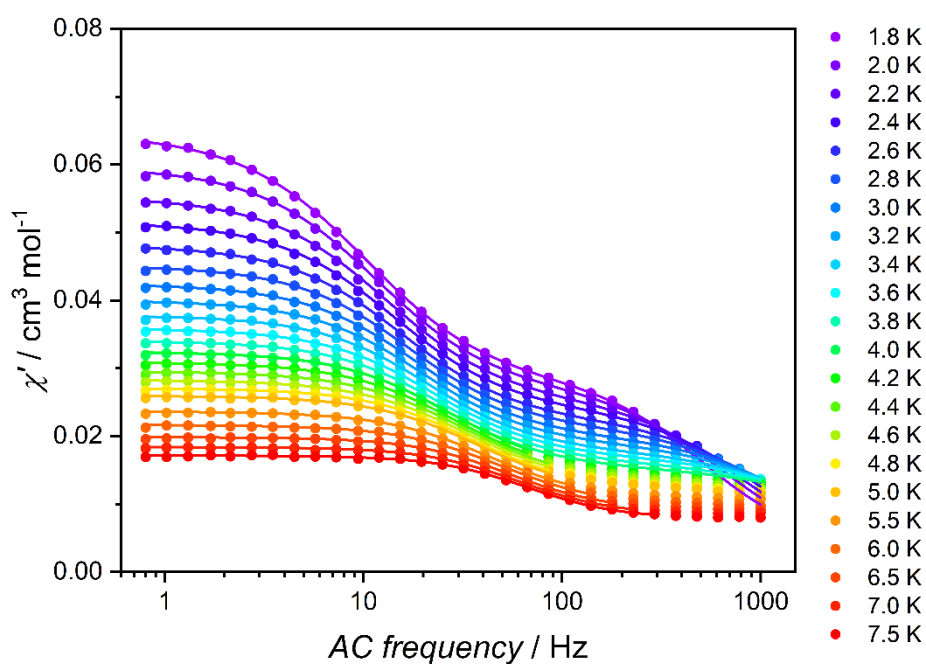

**Figure S18.** Frequency dependence of  $\chi'$  recorded at  $H_{dc} = 3000$  Oe for **3** in the 1.8-7.5 K range. Solid lines present the best fits to the generalised Debye model.

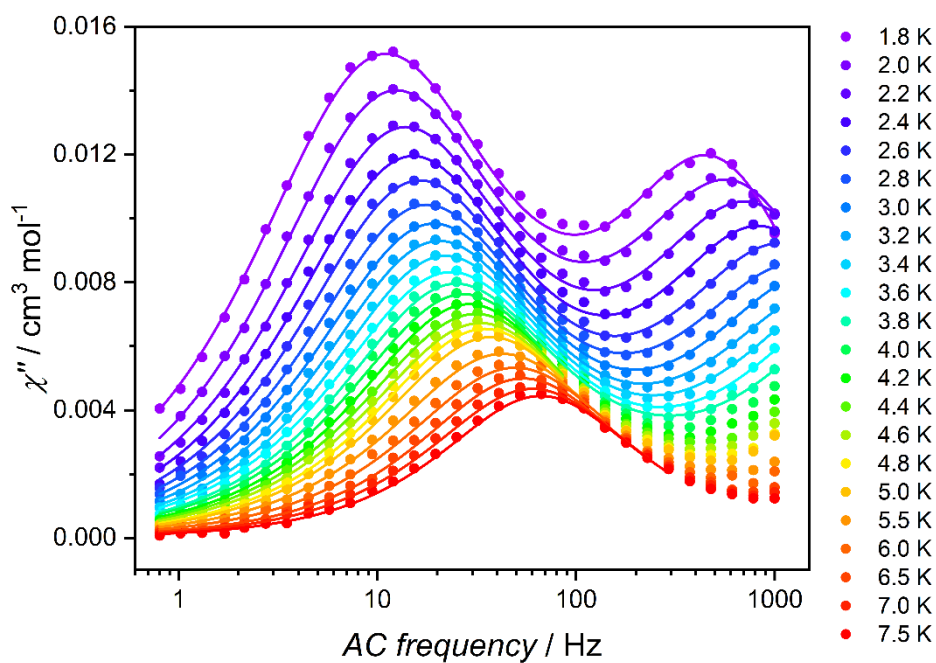

**Figure S19.** Frequency dependence of  $\chi''$  recorded at  $H_{dc} = 3000$  Oe for **3** in the 1.8-7.5 K range. Solid lines present the best fits to the generalised Debye model.

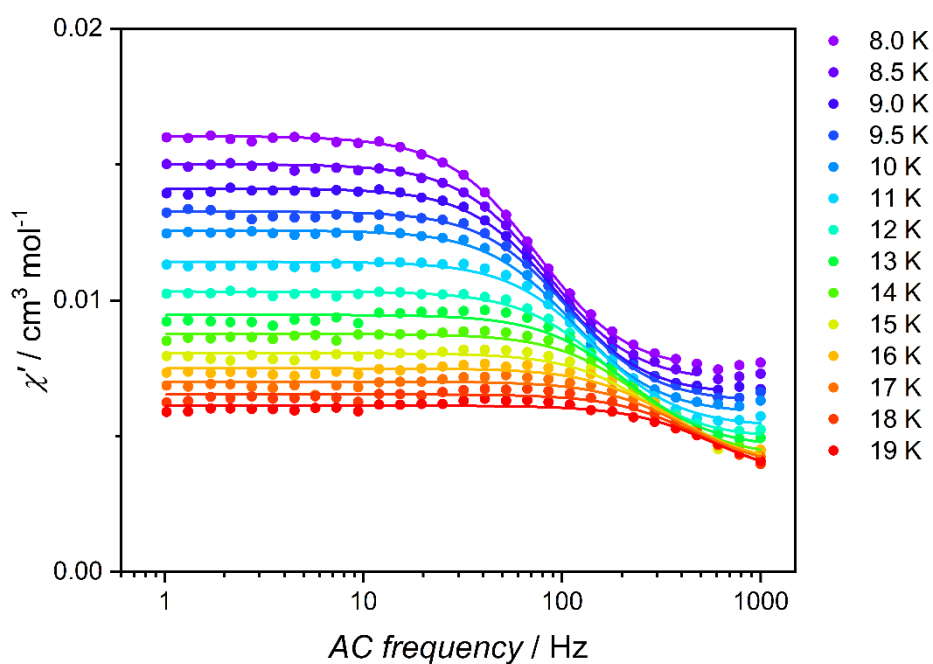

**Figure S20.** Frequency dependence of  $\chi'$  recorded at  $H_{dc} = 3000$  Oe for **3** in the 8-19 K range. Solid lines present the best fits to the generalised Debye model.

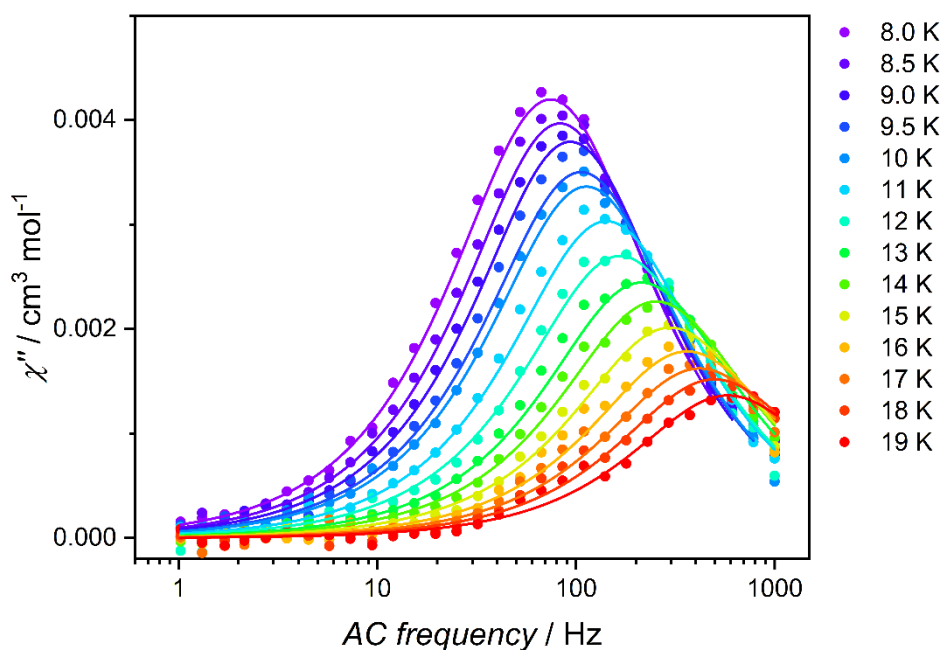

**Figure S21.** Frequency dependence of  $\chi''$  recorded at  $H_{dc} = 3000$  Oe for **3** in the 8-19 K range. Solid lines present the best fits to the generalised Debye model.

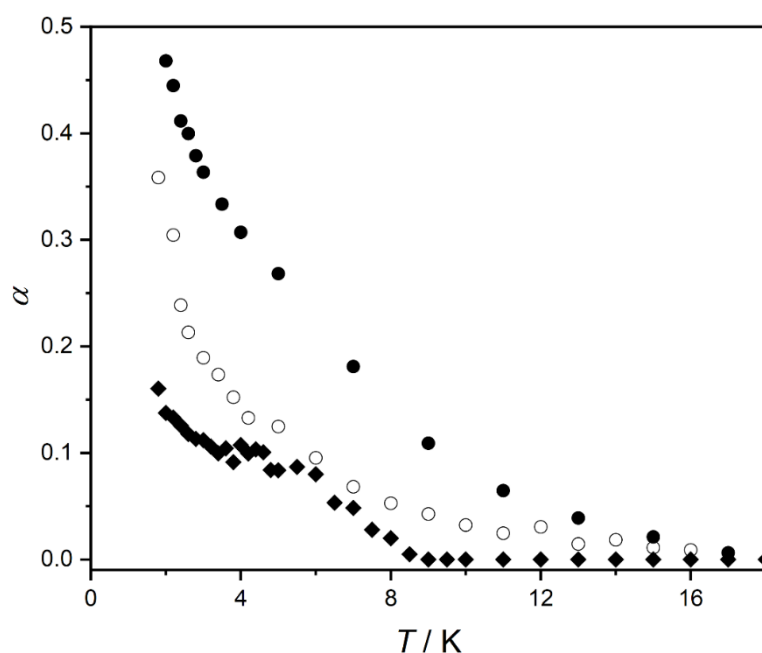

**Figure S22.** Thermal dependence of  $\alpha$  derived from  $ac$  susceptibility measurements for **1** (black circles), **2** (open circles) and **3** (black rhombi).

**Table S5.** Fit parameters obtained from  $ac$  magnetic measurements for **1-3** at 2000, 2500 and 3000 Oe, respectively.\*

| Compound            | <b>1</b>     | <b>2</b>     | <b>3</b>     |
|---------------------|--------------|--------------|--------------|
| $B / s^{-1}$        | 11.7 (fixed) | 52.5 (fixed) | 50.6 (fixed) |
| $C / s^{-1} K^{-n}$ | 0.88(6)      | 16(1)        | 1.05(10)     |
| $n$                 | 2.94(3)      | 1.95(3)      | 2.74(3)      |
| $D / s^{-1} K^{-1}$ | 0.78 (fixed) | 4.17 (fixed) | 9.4 (fixed)  |
| $R^2$               | 0.99973      | 0.99835      | 0.99835      |

\*assuming  $\tau^{-1}(T) = B + CT^n + DT$

#### Bibliography:

- 1 W. Wegner, J. J. Zakrzewski, M. Zychowicz and S. Chorazy, *Sci. Reports* 2021 111, 2021, **11**, 1–13.
- 2 T. Jaroń, W. Wegner, M. K. Cyrański, Dobrzycki and W. Grochala, *J. Solid State Chem.*, 2012, **191**, 279–282.
- 3 W. Wegner and T. Jaroń, *Mater.* 2021, Vol. 14, Page 1329, 2021, **14**, 1329.
- 4 R. D. Shannon, *Acta Crystallogr. Sect. A*, 1976, **32**, 751–767.
